# Supplementary material
Source: MDPI journal article supplement (https://www.mdpi.com/2039-4349/12/6/65)
Supplement: s1 [file s1]

**Table S1:** Frequency of self-reported COVID-19 symptoms experienced by participants during the acute phase of infection.

| <b>COVID-19 Symptoms</b> | <b>Un-infected<br/>(N=120)<br/>N (%)</b> | <b>Alpha &amp; Beta<br/>(N=301)<br/>N (%)</b> | <b>Delta variant<br/>(N=102)<br/>N (%)</b> | <b>Omicron variant<br/>(N=416)<br/>N (%)</b> | <b>P-value</b> |
|--------------------------|------------------------------------------|-----------------------------------------------|--------------------------------------------|----------------------------------------------|----------------|
| Asymptomatic             | 56 (46.67)                               | 35 (11.63)                                    | 18 (17.6)                                  | 45 (10.82)                                   | <0.001         |
| Cough                    | 36 (30)                                  | 167 (55.48)                                   | 74 (72.54)                                 | 248 (59.61)                                  | <0.001         |
| Fever                    | 13 (10.83)                               | 141 (46.84)                                   | 34 (33.33)                                 | 151 (36.29)                                  | <0.001         |
| Breathing difficulties   | 1 (0.8)                                  | 111 (36.88)                                   | 33 (32.35)                                 | 85 (20.43)                                   | <0.001         |
| Fatigue                  | 24 (20)                                  | 121 (40.19)                                   | 66 (64.71)                                 | 234 (56.25)                                  | <0.001         |
| Headache                 | 18 (15)                                  | 107 (35.55)                                   | 42 (41.18)                                 | 174 (41.83)                                  | <0.001         |
| Migraine                 | 3 (2.5)                                  | 15 (4.98)                                     | 3 (2.9)                                    | 34 (8.17)                                    | 0.065          |
| Loss of smell            | 0                                        | 104 (34.55)                                   | 30 (29.41)                                 | 48 (11.54)                                   | <0.001         |
| Loss of taste            | 0                                        | 90 (29.90)                                    | 22 (21.6)                                  | 45 (10.82)                                   | <0.001         |
| Chest pain               | 2 (1.67)                                 | 44 (14.62)                                    | 15 (14.7)                                  | 67 (16.11)                                   | 0.001          |
| Diarrhea                 | 0                                        | 59 (19.60)                                    | 16 (15.7)                                  | 59 (14.18)                                   | <0.001         |
| Back and joint pain      | 12 (10)                                  | 90 (29.90)                                    | 46 (45.09)                                 | 177 (42.55)                                  | <0.001         |
| Sore throat              | 32 (26.67)                               | 46 (15.28)                                    | 26 (25.49)                                 | 219 (52.64)                                  | <0.001         |
| Runny nose               | 44 (36.9)                                | 15 (4.98)                                     | 17 (16.7)                                  | 172 (41.34)                                  | <0.001         |
| Sneezing                 | 30 (25)                                  | 6 (1.99)                                      | 12 (11.8)                                  | 114 (27.40)                                  | <0.001         |

**Table S2:** Frequency of self-reported auditory symptoms among patients with COVID-19 during the acute phase of the disease

| <b>Auditory symptoms</b> | <b>Un-infected<br/>(N=120)<br/>N (%)</b> | <b>Alpha &amp; Beta<br/>(N=301)<br/>N (%)</b> | <b>Delta variant<br/>(N=77)<br/>N (%)</b> | <b>Omicron variant<br/>(N=416)<br/>N (%)</b> | <b>P-value</b> |
|--------------------------|------------------------------------------|-----------------------------------------------|-------------------------------------------|----------------------------------------------|----------------|
| Before COVID 19          |                                          |                                               |                                           |                                              |                |
| Hearing loss             | 5 (4.17)                                 | 23 (7.64)                                     | 6 (5.88)                                  | 19 (4.57)                                    | 0.224          |
| Tinnitus                 | 4 (3.33)                                 | 9 (2.99)                                      | 8 (7.84)                                  | 16 (3.5)                                     | 0.191          |
| After COVID 19           |                                          |                                               |                                           |                                              |                |
| Hearing loss             |                                          |                                               |                                           |                                              | 0.010          |
| Mild                     | 2 (1.67)                                 | 14 (4.65)                                     | 11 (10.78)                                | 37 (8.89)                                    |                |
| Moderate                 | 0                                        | 4 (1.33)                                      | 0                                         | 3 (0.72)                                     |                |
| Severe                   | 0                                        | 1 (0.33)                                      | 1 (0.98)                                  | 0                                            |                |
| Total                    | 2 (1.67)                                 | 19 (6.31)                                     | 12 (11.76)                                | 40 (9.61)                                    |                |
| Tinnitus                 |                                          |                                               |                                           |                                              | 0.005          |
| Mild                     | 2 (1.67)                                 | 23 (7.64)                                     | 10 (9.80)                                 | 48 (11.53)                                   |                |
| Moderate                 | 0                                        | 5 (1.66)                                      | 3 (2.94)                                  | 3 (0.72)                                     |                |
| Severe                   | 0                                        | 2 (0.66)                                      | 1 (0.98)                                  | 1 (0.24)                                     |                |
| Total                    | 2 (1.67)                                 | 30 (9.97)                                     | 14 (13.72)                                | 52 (12.5)                                    |                |
| Aural fullness           |                                          |                                               |                                           |                                              | 0.002          |
| Mild                     | 8 (6.67)                                 | 43 (14.28)                                    | 16 (15.69)                                | 84 (20.19)                                   |                |
| Moderate                 | 0                                        | 10 (3.32)                                     | 10 (9.80)                                 | 3 (0.72)                                     |                |
| Severe                   | 0                                        | 4 (1.33)                                      | 1 (0.98)                                  | 1 (0.24)                                     |                |
| Total                    | 9 (7.5)                                  | 57 (18.93)                                    | 27 (26.47)                                | 88 (21.15)                                   |                |

**Table S3:** Multivariate logistic binary regression analysis for hearing loss reported during the acute phase of COVID-19 disease.

|                        | B      | S.E. | Wald   | df | P-value | OR    | 95% CI for OR |        |
|------------------------|--------|------|--------|----|---------|-------|---------------|--------|
|                        |        |      |        |    |         |       | Lower         | Upper  |
| Group (R: Control)     |        |      | 5.635  | 3  | .131    |       |               |        |
| Alpha/Beta             | .794   | .811 | .958   | 1  | .328    | 2.212 | .451          | 10.845 |
| Delta                  | 1.293  | .830 | 2.427  | 1  | .119    | 3.643 | .716          | 18.531 |
| Omicron                | 1.427  | .759 | 3.536  | 1  | .060    | 4.168 | .941          | 18.453 |
| Gender (R: Male)       | -.563  | .287 | 3.863  | 1  | .049    | .569  | .325          | .998   |
| Age                    | -.001  | .014 | .009   | 1  | .925    | .999  | .971          | 1.027  |
| Diabetes               | .027   | .540 | .002   | 1  | .961    | 1.027 | .357          | 2.958  |
| Hypertension           | .281   | .478 | .346   | 1  | .557    | 1.325 | .519          | 3.383  |
| Respiratory diseases   | .696   | .428 | 2.642  | 1  | .104    | 2.006 | .867          | 4.644  |
| Anemia                 | .606   | .449 | 1.820  | 1  | .177    | 1.833 | .760          | 4.423  |
| Cough                  | .254   | .301 | .708   | 1  | .400    | 1.289 | .714          | 2.327  |
| Breathing difficulties | -.113  | .318 | .127   | 1  | .721    | .893  | .479          | 1.665  |
| Fatigue                | -.009  | .310 | .001   | 1  | .976    | .991  | .540          | 1.818  |
| Fever                  | -.081  | .289 | .078   | 1  | .780    | .922  | .524          | 1.624  |
| Headache               | .375   | .286 | 1.722  | 1  | .189    | 1.455 | .831          | 2.547  |
| Migraine               | 1.088  | .410 | 7.039  | 1  | .008    | 2.968 | 1.329         | 6.630  |
| Loss of smell          | .999   | .397 | 6.340  | 1  | .012    | 2.716 | 1.248         | 5.912  |
| Loss of taste          | -.296  | .420 | .495   | 1  | .482    | .744  | .326          | 1.696  |
| Chest pain             | .028   | .362 | .006   | 1  | .938    | 1.028 | .506          | 2.089  |
| Diarrhea               | -.452  | .377 | 1.433  | 1  | .231    | .636  | .304          | 1.334  |
| Back & joint pain      | .814   | .297 | 7.524  | 1  | .006    | 2.257 | 1.262         | 4.037  |
| Sore throat            | -.016  | .310 | .003   | 1  | .959    | .984  | .536          | 1.806  |
| Runny nose             | -.084  | .344 | .059   | 1  | .808    | .920  | .469          | 1.804  |
| Sneezing               | .013   | .374 | .001   | 1  | .973    | 1.013 | .486          | 2.109  |
| Antiviral drug         | -.097  | .231 | .176   | 1  | .675    | .908  | .577          | 1.428  |
| Constant               | -4.234 | .889 | 22.661 | 1  | .000    | .014  |               |        |

**Table S4:** Multivariate logistic binary regression analysis for tinnitus reported during the acute phase of COVID-19 disease.

|                        | B      | S.E. | Wald   | df | P-value | OR    | 95% CI for OR |        |
|------------------------|--------|------|--------|----|---------|-------|---------------|--------|
|                        |        |      |        |    |         |       | Lower         | Upper  |
| Group (R: Control)     |        |      | 4.089  | 3  | .252    |       |               |        |
| Alpha/Beta             | 1.461  | .788 | 3.435  | 1  | .064    | 4.312 | .919          | 20.223 |
| Delta                  | 1.487  | .809 | 3.374  | 1  | .066    | 4.422 | .905          | 21.605 |
| Omicron                | 1.518  | .751 | 4.079  | 1  | .043    | 4.561 | 1.046         | 19.887 |
| Gender (R: Male)       | .135   | .253 | .287   | 1  | .592    | 1.145 | .698          | 1.878  |
| Age                    | .027   | .012 | 4.760  | 1  | .029    | 1.027 | 1.003         | 1.052  |
| Diabetes               | .225   | .412 | .298   | 1  | .585    | 1.252 | .558          | 2.811  |
| Hypertension           | .638   | .379 | 2.831  | 1  | .092    | 1.893 | .900          | 3.982  |
| Respiratory diseases   | .566   | .387 | 2.143  | 1  | .143    | 1.761 | .826          | 3.757  |
| Anemia                 | .506   | .404 | 1.569  | 1  | .210    | 1.659 | .752          | 3.660  |
| Cough                  | .019   | .261 | .005   | 1  | .942    | 1.019 | .611          | 1.700  |
| Breathing difficulties | .139   | .269 | .266   | 1  | .606    | 1.149 | .678          | 1.947  |
| Fatigue                | .355   | .272 | 1.704  | 1  | .192    | 1.426 | .837          | 2.430  |
| Fever                  | -.016  | .255 | .004   | 1  | .950    | .984  | .597          | 1.622  |
| Headache               | .383   | .250 | 2.356  | 1  | .125    | 1.467 | .899          | 2.394  |
| Migraine               | .861   | .383 | 5.065  | 1  | .024    | 2.366 | 1.118         | 5.009  |
| Loss of smell          | .817   | .361 | 5.125  | 1  | .024    | 2.264 | 1.116         | 4.595  |
| Loss of taste          | -.885  | .395 | 5.008  | 1  | .025    | .413  | .190          | .896   |
| Chest pain             | .312   | .299 | 1.089  | 1  | .297    | 1.366 | .761          | 2.453  |
| Diarrhea               | -.048  | .306 | .024   | 1  | .876    | .953  | .523          | 1.737  |
| Back & joint pain      | .572   | .259 | 4.877  | 1  | .027    | 1.772 | 1.067         | 2.945  |
| Sore throat            | -.470  | .283 | 2.750  | 1  | .097    | .625  | .359          | 1.089  |
| Runny nose             | .172   | .310 | .308   | 1  | .579    | 1.188 | .647          | 2.181  |
| Sneezing               | .310   | .331 | .877   | 1  | .349    | 1.364 | .712          | 2.610  |
| Antiviral drug         | -.176  | .193 | .831   | 1  | .362    | .838  | .574          | 1.225  |
| Constant               | -5.536 | .865 | 40.913 | 1  | .000    | .004  |               |        |

**Table S5:** Multivariate logistic binary regression analysis for aural fullness reported during the acute phase of COVID-19 disease.

|                        | B      | S.E. | Wald   | df | P-value | OR    | 95% CI for OR |       |
|------------------------|--------|------|--------|----|---------|-------|---------------|-------|
|                        |        |      |        |    |         |       | Lower         | Upper |
| Group (R: Control)     |        |      | 2.755  | 3  | .431    |       |               |       |
| Alpha/Beta             | .549   | .425 | 1.672  | 1  | .196    | 1.732 | .753          | 3.983 |
| Delta                  | .744   | .452 | 2.705  | 1  | .100    | 2.104 | .867          | 5.107 |
| Omicron                | .458   | .394 | 1.352  | 1  | .245    | 1.581 | .731          | 3.419 |
| Gender (R: Male)       | .222   | .195 | 1.292  | 1  | .256    | 1.248 | .852          | 1.830 |
| Age                    | -.002  | .010 | .036   | 1  | .850    | .998  | .979          | 1.017 |
| Diabetes               | .001   | .369 | .000   | 1  | .998    | 1.001 | .486          | 2.064 |
| Hypertension           | -.374  | .385 | .943   | 1  | .332    | .688  | .324          | 1.463 |
| Respiratory diseases   | .246   | .343 | .513   | 1  | .474    | 1.279 | .653          | 2.505 |
| Anemia                 | .216   | .346 | .391   | 1  | .532    | 1.242 | .630          | 2.448 |
| Cough                  | .059   | .202 | .085   | 1  | .770    | 1.061 | .714          | 1.577 |
| Breathing difficulties | -.117  | .218 | .288   | 1  | .591    | .890  | .581          | 1.363 |
| Fatigue                | .456   | .209 | 4.756  | 1  | .029    | 1.578 | 1.047         | 2.378 |
| Fever                  | .068   | .199 | .116   | 1  | .734    | 1.070 | .724          | 1.581 |
| Headache               | .231   | .197 | 1.368  | 1  | .242    | 1.259 | .856          | 1.854 |
| Migraine               | .415   | .326 | 1.624  | 1  | .203    | 1.515 | .800          | 2.868 |
| Loss of smell          | .572   | .289 | 3.928  | 1  | .047    | 1.772 | 1.006         | 3.122 |
| Loss of taste          | -.064  | .300 | .045   | 1  | .832    | .938  | .521          | 1.689 |
| Chest pain             | .325   | .247 | 1.734  | 1  | .188    | 1.384 | .853          | 2.243 |
| Diarrhea               | .017   | .241 | .005   | 1  | .943    | 1.017 | .634          | 1.633 |
| Back & joint pain      | .576   | .199 | 8.359  | 1  | .004    | 1.780 | 1.204         | 2.630 |
| Sore throat            | .195   | .214 | .835   | 1  | .361    | 1.216 | .800          | 1.848 |
| Runny nose             | -.225  | .246 | .835   | 1  | .361    | .798  | .493          | 1.294 |
| Sneezing               | .043   | .264 | .027   | 1  | .871    | 1.044 | .622          | 1.751 |
| Antiviral drug         | -.133  | .161 | .684   | 1  | .408    | .875  | .639          | 1.200 |
| Constant               | -2.791 | .503 | 30.801 | 1  | .000    | .061  |               |       |

**Table S6:** Frequency of self-reported vestibular symptoms among patients with COVID-19 during the acute phase of the disease

| <b>Vestibular symptoms</b> | <b>Un-infected<br/>(N=120)<br/>N (%)</b> | <b>Alpha &amp; Beta<br/>(N=301)<br/>N (%)</b> | <b>Delta variant<br/>(N=50)<br/>N (%)</b> | <b>Omicron variant<br/>(N=416)<br/>N (%)</b> | <b>P-value</b> |
|----------------------------|------------------------------------------|-----------------------------------------------|-------------------------------------------|----------------------------------------------|----------------|
| Before COVID 19            |                                          |                                               |                                           |                                              |                |
| Imbalance                  | 1 (0.833)                                | 10 (3.32)                                     | 0                                         | 5 (1.20)                                     | 0.054          |
| Dizziness                  | 1 (0.83)                                 | 19 (6.31)                                     | 5 (4.90)                                  | 8 (1.92)                                     | 0.004          |
| Vertigo                    | 1 (0.83)                                 | 11 (3.65)                                     | 2 (1.96)                                  | 5 (1.20)                                     | 0.097          |
| After COVID 19             |                                          |                                               |                                           |                                              |                |
| Imbalance                  |                                          |                                               |                                           |                                              | 0.001          |
| Mild                       | 1 (0.83)                                 | 18 (5.98)                                     | 13 (12.75)                                | 46 (11.06)                                   |                |
| Moderate                   | 0                                        | 5 (1.66)                                      | 0                                         | 6 (1.44)                                     |                |
| Severe                     | 0                                        | 2 (0.66)                                      | 0                                         | 0                                            |                |
| Total                      | 1 (0.83)                                 | 25 (8.30)                                     | 13 (12.75)                                | 52 (12.5)                                    |                |
| Dizziness                  |                                          |                                               |                                           |                                              | <0.001         |
| Mild                       | 5 (4.17)                                 | 57 (18.93)                                    | 30 (29.41)                                | 113 (27.16)                                  |                |
| Moderate                   | 0                                        | 24 (7.97)                                     | 2 (1.96)                                  | 23 (5.53)                                    |                |
| Severe                     | 0                                        | 9 (2.90)                                      | 3 (2.94)                                  | 0                                            |                |
| Total                      | 5 (4.17)                                 | 90 (29.90)                                    | 35 (34.31)                                | 136 (32.69)                                  |                |
| Vertigo                    |                                          |                                               |                                           |                                              | < 0.001        |
| Mild                       | 1 (0.83)                                 | 47 (15.61)                                    | 28 (27.45)                                | 99 (32.79)                                   |                |
| Moderate                   | 0                                        | 17 (5.65)                                     | 2 (1.96)                                  | 19 (4.57)                                    |                |
| Severe                     | 0                                        | 9 (2.99)                                      | 0                                         | 2 (0.48)                                     |                |
| Total                      | 1 (0.83)                                 | 73 (24.25)                                    | 30 (29.41)                                | 121 (29.1)                                   |                |

**Table S7:** Multivariate logistic binary regression analysis for unsteadiness reported during the acute phase of COVID-19 disease.

|                        | B      | S.E.  | Wald   | df | P-value | OR    | 95% CI for OR |        |
|------------------------|--------|-------|--------|----|---------|-------|---------------|--------|
|                        |        |       |        |    |         |       | Lower         | Upper  |
| Group (R: Control)     |        |       | 4.293  | 3  | .231    |       |               |        |
| Alpha/Beta             | 2.124  | 1.066 | 3.974  | 1  | .046    | 8.368 | 1.036         | 67.555 |
| Delta                  | 2.162  | 1.077 | 4.032  | 1  | .045    | 8.688 | 1.053         | 71.679 |
| Omicron                | 2.125  | 1.033 | 4.236  | 1  | .040    | 8.373 | 1.107         | 63.353 |
| Gender (R: Male)       | .297   | .262  | 1.283  | 1  | .257    | 1.345 | .805          | 2.247  |
| Age                    | .012   | .013  | .818   | 1  | .366    | 1.012 | .987          | 1.037  |
| Diabetes               | -1.050 | .577  | 3.307  | 1  | .069    | .350  | .113          | 1.085  |
| Hypertension           | .562   | .421  | 1.780  | 1  | .182    | 1.754 | .768          | 4.005  |
| Respiratory diseases   | -.013  | .442  | .001   | 1  | .977    | .987  | .415          | 2.347  |
| Anemia                 | .288   | .425  | .458   | 1  | .499    | 1.334 | .579          | 3.070  |
| Cough                  | .593   | .282  | 4.406  | 1  | .036    | 1.809 | 1.040         | 3.145  |
| Breathing difficulties | -.042  | .274  | .024   | 1  | .877    | .958  | .560          | 1.641  |
| Fatigue                | .728   | .285  | 6.527  | 1  | .011    | 2.070 | 1.185         | 3.618  |
| Fever                  | -.130  | .257  | .256   | 1  | .613    | .878  | .530          | 1.454  |
| Headache               | .210   | .254  | .684   | 1  | .408    | 1.233 | .750          | 2.027  |
| Migraine               | .180   | .418  | .185   | 1  | .667    | 1.197 | .527          | 2.719  |
| Loss of smell          | -.106  | .393  | .073   | 1  | .787    | .899  | .416          | 1.942  |
| Loss of taste          | .059   | .404  | .022   | 1  | .883    | 1.061 | .481          | 2.342  |
| Chest pain             | .020   | .309  | .004   | 1  | .948    | 1.020 | .556          | 1.871  |
| Diarrhea               | -.104  | .311  | .112   | 1  | .738    | .901  | .490          | 1.656  |
| Back & joint pain      | .477   | .259  | 3.397  | 1  | .065    | 1.612 | .970          | 2.678  |
| Sore throat            | -.053  | .280  | .035   | 1  | .851    | .949  | .548          | 1.644  |
| Runny nose             | .016   | .315  | .003   | 1  | .959    | 1.016 | .548          | 1.886  |
| Sneezing               | .175   | .333  | .277   | 1  | .598    | 1.192 | .621          | 2.288  |
| Antiviral drug         | -.011  | .193  | .003   | 1  | .954    | .989  | .677          | 1.444  |
| Constant               | -5.923 | 1.131 | 27.452 | 1  | .000    | .003  |               |        |

**Table S8:** Multivariate logistic binary regression analysis for dizziness reported during the acute phase of COVID-19 disease.

|                        | B      | S.E. | Wald   | df | P-value | OR    | 95% CI for OR |        |
|------------------------|--------|------|--------|----|---------|-------|---------------|--------|
|                        |        |      |        |    |         |       | Lower         | Upper  |
| Group (R: Control)     |        |      | 15.419 | 3  | .001    |       |               |        |
| Alpha/Beta             | 2.000  | .515 | 15.080 | 1  | .000    | 7.386 | 2.692         | 20.263 |
| Delta                  | 1.772  | .536 | 10.951 | 1  | .001    | 5.883 | 2.060         | 16.805 |
| Omicron                | 1.562  | .488 | 10.227 | 1  | .001    | 4.768 | 1.831         | 12.418 |
| Gender (R: Male)       | .441   | .180 | 6.029  | 1  | .014    | 1.554 | 1.093         | 2.209  |
| Age                    | .017   | .009 | 3.760  | 1  | .052    | 1.017 | 1.000         | 1.035  |
| Diabetes               | -.112  | .312 | .130   | 1  | .719    | .894  | .485          | 1.648  |
| Hypertension           | -.329  | .322 | 1.044  | 1  | .307    | .720  | .383          | 1.352  |
| Respiratory diseases   | -.049  | .323 | .023   | 1  | .879    | .952  | .506          | 1.793  |
| Anemia                 | .637   | .320 | 3.975  | 1  | .046    | 1.891 | 1.011         | 3.538  |
| Cough                  | .130   | .183 | .504   | 1  | .478    | 1.139 | .795          | 1.631  |
| Breathing difficulties | .290   | .194 | 2.238  | 1  | .135    | 1.336 | .914          | 1.954  |
| Fatigue                | .788   | .185 | 18.219 | 1  | .000    | 2.198 | 1.531         | 3.156  |
| Fever                  | .267   | .179 | 2.226  | 1  | .136    | 1.305 | .920          | 1.853  |
| Headache               | .445   | .175 | 6.440  | 1  | .011    | 1.561 | 1.107         | 2.202  |
| Migraine               | .243   | .317 | .590   | 1  | .443    | 1.275 | .685          | 2.373  |
| Loss of smell          | .204   | .267 | .586   | 1  | .444    | 1.227 | .727          | 2.070  |
| Loss of taste          | -.073  | .275 | .071   | 1  | .790    | .930  | .542          | 1.593  |
| Chest pain             | -.018  | .229 | .006   | 1  | .938    | .982  | .627          | 1.539  |
| Diarrhea               | -.210  | .222 | .892   | 1  | .345    | .811  | .524          | 1.253  |
| Back & joint pain      | .305   | .180 | 2.856  | 1  | .091    | 1.356 | .952          | 1.931  |
| Sore throat            | .307   | .193 | 2.530  | 1  | .112    | 1.359 | .931          | 1.984  |
| Runny nose             | -.050  | .224 | .051   | 1  | .822    | .951  | .613          | 1.475  |
| Sneezing               | .257   | .241 | 1.138  | 1  | .286    | 1.294 | .806          | 2.076  |
| Antiviral drug         | -.138  | .137 | 1.013  | 1  | .314    | .871  | .666          | 1.140  |
| Constant               | -4.538 | .581 | 61.080 | 1  | .000    | .011  |               |        |



**Table S9:** Multivariate logistic binary regression analysis for vertigo reported during the acute phase of COVID-19 disease.

|                        | B      | S.E.  | Wald   | df | P-value | OR     | 95% CI for OR |         |
|------------------------|--------|-------|--------|----|---------|--------|---------------|---------|
|                        |        |       |        |    |         |        | Lower         | Upper   |
| Group (R: Control)     |        |       | 9.398  | 3  | .024    |        |               |         |
| Alpha/Beta             | 3.168  | 1.034 | 9.398  | 1  | .002    | 23.767 | 3.135         | 180.173 |
| Delta                  | 3.080  | 1.045 | 8.686  | 1  | .003    | 21.759 | 2.806         | 168.731 |
| Omicron                | 3.030  | 1.019 | 8.834  | 1  | .003    | 20.695 | 2.806         | 152.611 |
| Gender (R: Male)       | .487   | .190  | 6.561  | 1  | .010    | 1.627  | 1.121         | 2.362   |
| Age                    | .015   | .009  | 2.415  | 1  | .120    | 1.015  | .996          | 1.034   |
| Diabetes               | .318   | .332  | .922   | 1  | .337    | 1.375  | .718          | 2.634   |
| Hypertension           | -.603  | .369  | 2.671  | 1  | .102    | .547   | .266          | 1.128   |
| Respiratory diseases   | -.071  | .346  | .042   | 1  | .838    | .932   | .472          | 1.837   |
| Anemia                 | .670   | .331  | 4.084  | 1  | .043    | 1.954  | 1.020         | 3.742   |
| Cough                  | -.107  | .195  | .299   | 1  | .585    | .899   | .613          | 1.318   |
| Breathing difficulties | .217   | .203  | 1.142  | 1  | .285    | 1.242  | .835          | 1.849   |
| Fatigue                | .699   | .198  | 12.401 | 1  | .000    | 2.011  | 1.363         | 2.967   |
| Fever                  | -.035  | .192  | .033   | 1  | .856    | .966   | .663          | 1.407   |
| Headache               | .565   | .187  | 9.107  | 1  | .003    | 1.760  | 1.219         | 2.540   |
| Migraine               | .276   | .324  | .725   | 1  | .394    | 1.317  | .699          | 2.484   |
| Loss of smell          | .412   | .278  | 2.206  | 1  | .137    | 1.510  | .877          | 2.603   |
| Loss of taste          | .258   | .283  | .830   | 1  | .362    | 1.295  | .743          | 2.256   |
| Chest pain             | .233   | .237  | .971   | 1  | .324    | 1.263  | .794          | 2.007   |
| Diarrhea               | -.182  | .234  | .604   | 1  | .437    | .833   | .526          | 1.319   |
| Back & joint pain      | .348   | .191  | 3.314  | 1  | .069    | 1.416  | .974          | 2.058   |
| Sore throat            | .159   | .206  | .594   | 1  | .441    | 1.172  | .783          | 1.755   |
| Runny nose             | -.176  | .239  | .545   | 1  | .460    | .838   | .525          | 1.339   |
| Sneezing               | .274   | .256  | 1.142  | 1  | .285    | 1.315  | .796          | 2.171   |
| Antiviral drug         | -.226  | .155  | 2.132  | 1  | .144    | .798   | .589          | 1.080   |
| Constant               | -5.876 | 1.070 | 30.166 | 1  | .000    | .003   |               |         |

**Table S10:** Univariate logistic binary regression analysis for auditory and vestibular symptoms reported during the acute phase of COVID-19 variants while considering only un-infected controls who self-reported contracting the seasonal flu (reference group: un-infected controls with seasonal flu).

|                | OR     | 95% CI for OR |         | <i>P</i> -Value |
|----------------|--------|---------------|---------|-----------------|
|                |        | Lower         | Upper   |                 |
| Hearing loss   |        |               |         |                 |
| Alpha/beta     | 1.99   | 0.45          | 8.77    | .364            |
| Delta          | 3.93   | 0.85          | 18.21   | .080            |
| Omicron        | 3.14   | 0.74          | 13.33   | .121            |
| Tinnitus       |        |               |         |                 |
| Alpha/beta     | 3.27   | 0.76          | 14.05   | 0.112           |
| Delta          | 4.69   | 1.03          | 21.41   | 0.046           |
| Omicron        | 4.21   | 1.00          | 17.77   | 0.050           |
| Aural Fullness |        |               |         |                 |
| Alpha/beta     | 1.35   | 0.63          | 2.89    | 0.442           |
| Delta          | 2.08   | 0.90          | 4.79    | 0.085           |
| Omicron        | 1.55   | 0.74          | 3.27    | 0.249           |
| Unsteadiness   |        |               |         |                 |
| Alpha/beta     | 5.44   | 0.72          | 40.89   | 0.100           |
| Delta          | 8.76   | 1.12          | 68.77   | 0.039           |
| Omicron        | 8.57   | 1.16          | 63.18   | 0.035           |
| Dizziness      |        |               |         |                 |
| Alpha/beta     | 4.777  | 1.852         | 12.322  | 0.001           |
| Delta          | 5.851  | 2.148         | 15.936  | 0.001           |
| Omicron        | 5.440  | 2.130         | 13.891  | 0.0001          |
| Vertigo        |        |               |         |                 |
| Alpha/beta     | 19.211 | 2.616         | 141.060 | .004            |
| Delta          | 25.000 | 3.311         | 188.761 | .002            |
| Omicron        | 24.324 | 3.333         | 177.515 | .002            |
