# Supplementary material
Source: MDPI journal article supplement (https://www.mdpi.com/2039-4349/12/6/65)
Supplement: s1 [file s1]

## Supplementary Materials: Questionnaire

### Audio-vestibular manifestations among COVID 19 patients

#### A- Personal and clinical characteristics

#### أ- البيانات الشخصية

1- What is your age? \_\_\_\_\_ Years

١- العمر: \_\_\_\_ سنة

2- Gender:

٢- الجنس:

☐ Male

☐ ذكر

☐ Female

☐ أنثى

3- Occupation?

٣- ماهي وظيفتك؟

☐ Healthcare practitioner

☐ موظف في المجال الصحي

☐ Teacher

☐ معلم

☐ Governmental sector

☐ موظف في القطاع الحكومي

☐ Private sector

☐ موظف في القطاع الخاص

☐ Military

☐ موظف عسكري

☐ Unemployed

☐ غير موظف

☐ Retired

☐ متقاعد

☐ Other: .....

☐ أخرى: .....

4- Do you have any of the following chronic conditions?

٤- هل لديك أي من الأمراض المزمنة التالية (يمكنك الاختيار أكثر من إجابة)؟

☐ I don't have chronic diseases

☐ ليس لدي أي أمراض مزمنة

☐ Diabetes

☐ سكري

☐ Hypertension

☐ ارتفاع ضغط الدم

☐ Cardiovascular diseases

☐ أمراض القلب

☐ Immunosuppression

☐ أمراض تنفسية مزمنة (الربو - حساسية مزمنة)

☐ Anemia

☐ نقص المناعة

☐ Stroke

☐ أنيميا منجلية

☐ Stroke

☐ السكتة الدماغية

☐ Temporomandibular joint

☐ اضطراب المفصل الصدغي الفكي

☐ Head injury

☐ إصابة بالرأس

☐ Other: .....

☐ أخرى (أذكرها): .....

5- Did you experience any symptoms after contracting COVID 19?

٥- هل ظهرت لديك أي أعراض بعد إصابتك بفيروس كورونا؟

☐ Yes

☐ نعم

☐ No

☐ لا

6- If yes, what are these symptoms?

٦- ما هي هذه الأعراض (يمكنك الاختيار أكثر من إجابة)؟

☐ Cough

☐ كحة

☐ Breathing difficulties

☐ ضيق وصعوبات في التنفس

☐ Fatigue and body weakness

☐ خمول عام في الجسم

☐ Fever

☐ ارتفاع درجة الحرارة

☐ Headache

☐ صداع عام

☐ Migraine

☐ صداع نصفي

☐ Loss of smell

☐ فقدان حاسة الشم

☐ Loss of taste

☐ فقدان حاسة التذوق

☐ Chest pain

☐ ألم في الصدر

☐ Diarrhea

☐ سعال

☐ Back and joints pain

☐ ألم في المفاصل والظهر

☐ no symptoms

☐ لا يوجد أعراض

☐ Other: .....

☐ أخرى (أذكرها): .....

## Supplementary Materials: Questionnaire

### Audio-vestibular manifestations among COVID 19 patients

7- Were you admitted to hospital after contracting COVID 19?

- ☐ Yes  
☐ No, home quarantine.

8- Were you admitted to the ICU after contracting COVID 19?

- ☐ Yes  
☐ No

9- Mechanical ventilation?

- ☐ Yes  
☐ No

10- Did you take any of the following antiviral drugs?

- ☐ Hydroxychloroquine  
☐ Favipiravir  
☐ Remdisivir  
☐ Dexamethasone (anti-inflammatory)  
☐ No

11- Please indicate any other medications such as pain killers you took (Panadol, Tylenol, Ibuprofen ... etc)?

٧- هل تم تنويمك في المستشفى نتيجة إصابتك بفيروس كورونا؟  
☐ نعم

☐ لا، العزل الطبي المنزلي  
٨- هل أدخلت وحدة العناية المركزة من أعراض فيروس كورونا؟  
☐ نعم

☐ لا  
٩- هل تم وضع جهاز التنفس الصناعي عليك نتيجة إصابتك بفيروس كورونا؟  
☐ نعم

☐ لا  
١٠- هل تم إعطاؤك أدوية مضادة للفيروسات للتخفيف من أعراض فيروس كورونا؟

- ☐ لا  
☐ نعم ، هيدروكسي كلوركوين  
☐ نعم ، رامديسيفير  
☐ نعم ، ديكساميثازون  
☐ نعم ، فافيبيرافير

١١- أذكر أية أدوية أخرى قمت باستخدامها في فترة التشافي من فيروس كورونا (بنادول، أدول، الإيبوبروفين، الأسبرين، تايلينول .. أخرى)؟

### B- Auditory symptoms after contracting COVID 19

12-Do you have hearing or ear-related problems before contracting COVID 19?

- ☐ Yes, mild hearing loss  
☐ Yes, moderate hearing loss  
☐ Yes, severe hearing loss  
☐ No

13-Do you have tinnitus before contracting COVID 19?

- ☐ Yes, intermittent  
☐ Yes, continuous  
☐ No

### ب: الأعراض المتعلقة بمشاكل السمع نتيجة الإصابة بفيروس كورونا:

١٢- هل لديك ضعف سمع أو مشاكل متعلقة بالأذن قبل إصابتك بفيروس كورونا؟

- ☐ نعم ، ضعف سمع بسيط  
☐ نعم ، ضعف سمع متوسط  
☐ نعم ، ضعف سمع شديد  
☐ لا

١٣- هل لديك طنين قبل إصابتك بفيروس كورونا؟

- ☐ نعم، طنين متقطع  
☐ نعم، طنين مستمر  
☐ لا

## Supplementary Materials: Questionnaire

### Audio-vestibular manifestations among COVID 19 patients

**14- After contracting COVID 19, did you experience hearing loss?**

- ☐ Yes, mild hearing loss
- ☐ Yes, moderate hearing loss
- ☐ Yes, severe hearing loss
- ☐ No

**15- After contracting COVID 19, did you experience tinnitus (ringing or buzzing in your ears or head in the absence of external sounds)?**

- ☐ Yes, mild tinnitus
- ☐ Yes, moderate tinnitus
- ☐ Yes, severe tinnitus
- ☐ No

**16- After contracting COVID 19, did you experience aural fullness in your ears (blockage or ear pressure)?**

- ☐ Yes, mild
- ☐ Yes, moderate
- ☐ Yes, severe
- ☐ No

**17- After contracting COVID 19, did you experience speech understanding difficulties in quiet?**

- ☐ Yes, mild
- ☐ Yes, moderate
- ☐ Yes, severe
- ☐ No

**18- After contracting COVID 19, did you experience speech understanding difficulties in noise?**

- ☐ Yes, mild
- ☐ Yes, moderate
- ☐ Yes, severe
- ☐ No

**19- Please indicate the duration in which you experienced auditory symptoms?**

١٤- بعد إصابتك بفيروس كورونا هل ظهرت لديك أعراض ضعف سمع أو مشاكل في السمع؟

- ☐ نعم ، ضعف سمع بسيط
- ☐ نعم ، ضعف سمع متوسط
- ☐ نعم ، ضعف سمع شديد
- ☐ لا

١٥- بعد إصابتك بفيروس كورونا هل ظهر لديك طنين في الأذن (طنين الأذن هو مصطلح لسمع صوت في الرأس و / أو الأذنين في غياب أي صوت خارجي ، يستمر لأكثر من خمس دقائق في المرة الواحدة)؟

- ☐ نعم ، طنين بسيط
- ☐ نعم ، طنين متوسط
- ☐ نعم ، طنين شديد
- ☐ لا

١٦- بعد إصابتك بفيروس كورونا هل ظهر لديك إحساس بضغط أو انسداد في الأذن؟

- ☐ نعم ، بسيط
- ☐ نعم ، متوسط
- ☐ نعم ، شديد
- ☐ لا

١٧- بعد إصابتك بفيروس كورونا هل ظهرت لديك مشاكل وصعوبة في فهم كلام الآخرين؟

- ☐ نعم، صعوبة بسيطة
- ☐ نعم، صعوبة متوسطة
- ☐ نعم، صعوبة شديدة
- ☐ لا، لم يكن لدي مشاكل في فهم كلام الآخرين بعد إصابتي بفيروس كورونا

١٨- بعد إصابتك بفيروس كورونا هل ظهرت لديك مشاكل في فهم كلام الآخرين خصوصاً في وجود الضجيج أو الضوضاء أو الإزعاج (مثال: في وجود مجموعة من المتحدثين - في مطعم مليء بالإزعاج - في فهم كلام الآخرين أثناء متابعة التلفزيون)؟

- ☐ نعم، صعوبة بسيطة
- ☐ نعم، صعوبة متوسطة
- ☐ نعم، صعوبة شديدة
- ☐ لا

١٩- ما هي المدة التي استمرت فيها أعراض السمع (ضعف سمع - طنين الخ) ان كنت قد عانيت من تلك الأعراض؟ (الرجاء كتابة المدة. مثال: خمسة أيام)

.....

## Supplementary Materials: Questionnaire

### Audio-vestibular manifestations among COVID 19 patients

#### 20- Did you have auditory symptoms and became worse after contracting COVID 19?

- ☐ Yes, tinnitus became worse
- ☐ Yes, hearing loss became worse
- ☐ Yes, I had auditory symptoms before COVID but did not became worse
- ☐ No, I did not have auditory problems before COVID 19

#### C- Vestibular symptoms after contracting COVID 19

##### 21- Before contracting COVID-19, do you have vestibular problems?

- ☐ Yes, dizziness
- ☐ Yes, vertigo
- ☐ Yes, unsteadiness
- ☐ No

##### 22- After contracting COVID 19, did you experience unsteadiness?

- ☐ Yes, mild
- ☐ Yes, moderate
- ☐ Yes, severe
- ☐ No

##### 23- After contracting COVID 19, did you experience dizziness?

- ☐ Yes, mild
- ☐ Yes, moderate
- ☐ Yes, severe
- ☐ No

##### 24- After contracting COVID 19, did you experience vertigo?

- ☐ Yes, mild
- ☐ Yes, moderate
- ☐ Yes, severe
- ☐ No

##### 25- Did you have vestibular problems before COVID and became worse after contracting COVID 19?

- ☐ Yes, dizziness became worse
- ☐ Yes, vertigo became worse
- ☐ No, I had vestibular problems before COVID but did not became worse
- ☐ No, I did not have vestibular problems before COVID 19

٢٠- هل كنت تعاني بمشاكل في السمع قبل إصابتك بفيروس كورونا وأصبحت هذه الأعراض في حالة أسوأ بعد إصابتك بفيروس كورونا؟

- ☐ نعم، ازدادت حدة الطنين
- ☐ نعم، مشاكل السمع أسوأ بعد إصابتي بفيروس كورونا
- ☐ لا، كان لدي مشاكل في السمع والطنين قبل الإصابة بكورونا لكن لم تزداد سوءاً بعد الإصابة بالفيروس
- ☐ لا، لم يكن لدي ضعف سمع وطنين قبل الإصابة بكورونا

#### ج: الأعراض المتعلقة بمشاكل التوازن نتيجة الإصابة بفيروس كورونا

##### ٢١- قبل إصابتك بفيروس كورونا، هل لديك مشاكل في التوازن مثل الدوران ودوخة؟

- ☐ نعم ، دوخة
- ☐ نعم ، دوران
- ☐ نعم مشاكل عامة في التوازن
- ☐ لا

##### ٢٢- بعد إصابتك بفيروس كورونا، هل ظهرت لديك اضطرابات في التوازن (الشعور بعدم الاتزان او على على وشك فقدان التوازن).

- ☐ نعم، مشاكل في التوازن بسيطة
- ☐ نعم، مشاكل متوسطة الشدة في التوازن
- ☐ نعم، مشاكل شديدة في التوازن
- ☐ لا، لم تظهر لدي أية مشاكل في التوازن

##### ٢٣- بعد إصابتك بفيروس كورونا، هل ظهرت لديك دوخة (عدم الثبات واللاتزان أثناء الجلوس أو الوقوف أو المشي)؟

- ☐ نعم، دوخة بسيطة
- ☐ نعم، دوخة متوسطة الشدة
- ☐ نعم، دوخة شديدة
- ☐ لا

##### ٢٤- بعد إصابتك بفيروس كورونا، هل ظهرت لديك احساس بالدوران (الشعور الزائف بالحركة أو الدوران سواءاً مان ذاتياً او الأشياء المحيطة (دوار)؟

- ☐ نعم، دوخة بسيطة
- ☐ نعم، دوخة متوسطة الشدة
- ☐ نعم، دوخة شديدة
- ☐ لا

##### ٢٥- هل كنت تعاني بمشاكل في التوازن قبل إصابتك بفيروس كورونا وأصبحت هذه الأعراض في حالة أسوأ بعد إصابتك بفيروس كورونا؟

- ☐ نعم، ازدادت شدة الدوخة
- ☐ نعم، ازدادت شدة الدوران
- ☐ لا، كان لدي مشاكل توازن قبل الإصابة بكورونا ولكن لم تزداد سوءاً
- ☐ لا، لم يكن لدي مشاكل في التوازن قبل إصابتي بفيروس كورونا

## Supplementary Materials: Questionnaire

### Audio-vestibular manifestations among COVID 19 patients

#### 26- Please indicate the nature of your vestibular problems you experienced during COVID 19?

- ☐ Feeling of dizziness and vertigo while changing the position of the head, such as turning on the bed
- ☐ Dizziness with rapid head movement
- ☐ Dizziness accompanied by feeling of faint
- ☐ Dizziness and vertigo accompanied by headache as well as sensitivity to light and sound
- ☐ An episode of dizziness or spinning that lasts for several seconds
- ☐ An episode of dizziness and dizziness that lasts for days
- ☐ An episode of severe dizziness and vertigo that lasted for days accompanied by nausea and vomiting
- ☐ An episode of severe dizziness and vertigo that lasted from minutes to hours
- ☐ Feeling of dizziness and vertigo from visual stimuli (in the car while passing cars - in the supermarket - browsing a book or computer)

#### 27- When did you start experiencing auditory and/or vestibular problems?

- ☐ First week of positive COVID 19 test
- ☐ Second week of positive COVID 19 test
- ☐ Third week of positive COVID 19 test
- ☐ I did not experience auditory or vestibular problems

#### 28- Do you have any further comments?

.....

.....

.....

#### Additional questions for individuals infected during the predominance periods of SARS-CoV-2 variants:

#### 29- Have you had COVID before Delta or Omicron?

#### 30- Did you take COVID-19 vaccine?

#### ٢٦- اختر من الخيارات التالية طبيعة مشاكل التوازن مثل الدوران ودوخة التي عانيت بها بعد إصابتك بفيروس كورونا (اختر جميع ما ينطبق)؟

- ☐ لم أعاني من مشاكل في التوازن
- ☐ الإحساس بالدوار ودوخة أثناء تغيير وضع الجسم والرأس كالإنقلاب على السرير
- ☐ دوخة تأتي مع حركة الرأس السريعة
- ☐ دوخة ويرافقها الشعور بالإغماء
- ☐ الإصابة بالصداع مع الدوار والدوخة وكذلك حساسية من الضوء والضوضاء.
- ☐ نوبة دوخة أو الدوران تستمر لثواني عديدة
- ☐ نوبة دوخة ودوران شديدة استمرت لأيام
- ☐ نوبة دوخة ودوران شديدة استمرت لأيام ورافقها غثيان وقئ (استفراغ)
- ☐ نوبة دوخة ودوران شديدة استمرت من دقائق لساعات
- ☐ الشعور بالدوار والدوخة من المحفزات البصرية (في السيارة أثناء مرور السيارات - في السوبرماركت - في تصفح الكتاب أو الكمبيوتر)

#### ٢٧- متى بدأ ظهور أي أعراض متعلقة بالسمع والتوازن؟

- ☐ لم تظهر لدي أعراض متعلقة بالسمع والتوازن
- ☐ خلال الأسبوع الأول من ظهور نتائج فحص كورونا
- ☐ بعد الأسبوع الثاني من ظهور نتائج فحص كورونا
- ☐ بعد الأسبوع الثالث من ظهور نتائج فحص كورونا
- ☐ بعد الأسبوع الرابع من ظهور نتائج فحص كورونا
- ☐ بعد الأسبوع الخامس من ظهور نتائج فحص كورونا

#### ٢٨- هل لديك أية تعليقات أو ملاحظات أخرى لم تذكر في الإستبيان؟

.....

.....

.....

#### أسئلة إضافية للأشخاص المصابين أثناء ظهور متحور دلتا ومتحور أوميكرون:

#### ٢٩- هل أصبت بكورونا قبل ظهور وانتشار أوميكرون ؟

#### ٣٠- هل أخذت لقاح الوقاية من كورونا؟
